# Supplementary material
Source: publisher figshare collection journal article supplement (https://karger.figshare.com/ndownloader/files/8711059)
Supplement: Supplementary file 1 [file 8711059]

**Supplementary Figure 1.** Online data supplement.

Detailed modified Rankin Score (mRS) Outcomes (0-6) at 3 months for the two subgroups: MRI and CT. Presented are percentages. For absolute numbers see table 6 (online data supplement).

**Supplementary table 1.** Online data supplement.

| **Table 6.** Detailed modified Rankin Score Outcomes (0-6) at 3 months | | |
| --- | --- | --- |
|  | CT  (N= 204) | MRI  (N= 141) |
| mRS (points) |  |  |
| 0 | 34 (17%) | 29 (21%) |
| 1 | 32 (16%) | 24 (17%) |
| 2 | 17 (8%) | 13 (9%) |
| 3 | 23 (11%) | 19 (13%) |
| 4 | 23 (11%) | 18 (13%) |
| 5 | 22 (11%) | 13 (9%) |
| 6 | 46 (23%) | 22 (16%) |
| Lost- to- follow-up | 7 (3%) | 3 (2%) |
| Data are number (%).  Abbreviations: CT= computed tomography; MRI= magnetic resonance imaging; mRS =modified Rankin Score | | |
